# Supplementary material for: The non-essential TSC complex component TBC1D7 restricts tissue mTORC1 signaling and brain and neuron growth
Source: PubMed Central journal article supplement — Cell Rep. Author manuscript; Available in PMC 2022 Jun 8. (PMC9175135; doi:10.1016/j.celrep.2022.110824), 2022-05-17
Supplement: NIHMS1808949-supplement-1.pdf [file NIHMS1808949-supplement-1.pdf]

**Cell Reports, Volume 39**

**Supplemental information**

**The non-essential TSC complex component**

**TBC1D7 restricts tissue mTORC1**

**signaling and brain and neuron growth**

**Sandra Schrötter, Christopher J. Yuskaitis, Michael R. MacArthur, Sarah J. Mitchell, Aaron M. Hosios, Maria Osipovich, Margaret E. Torrence, James R. Mitchell, Gerta Hoxhaj, Mustafa Sahin, and Brendan D. Manning**

# supplemental FIGURE 1

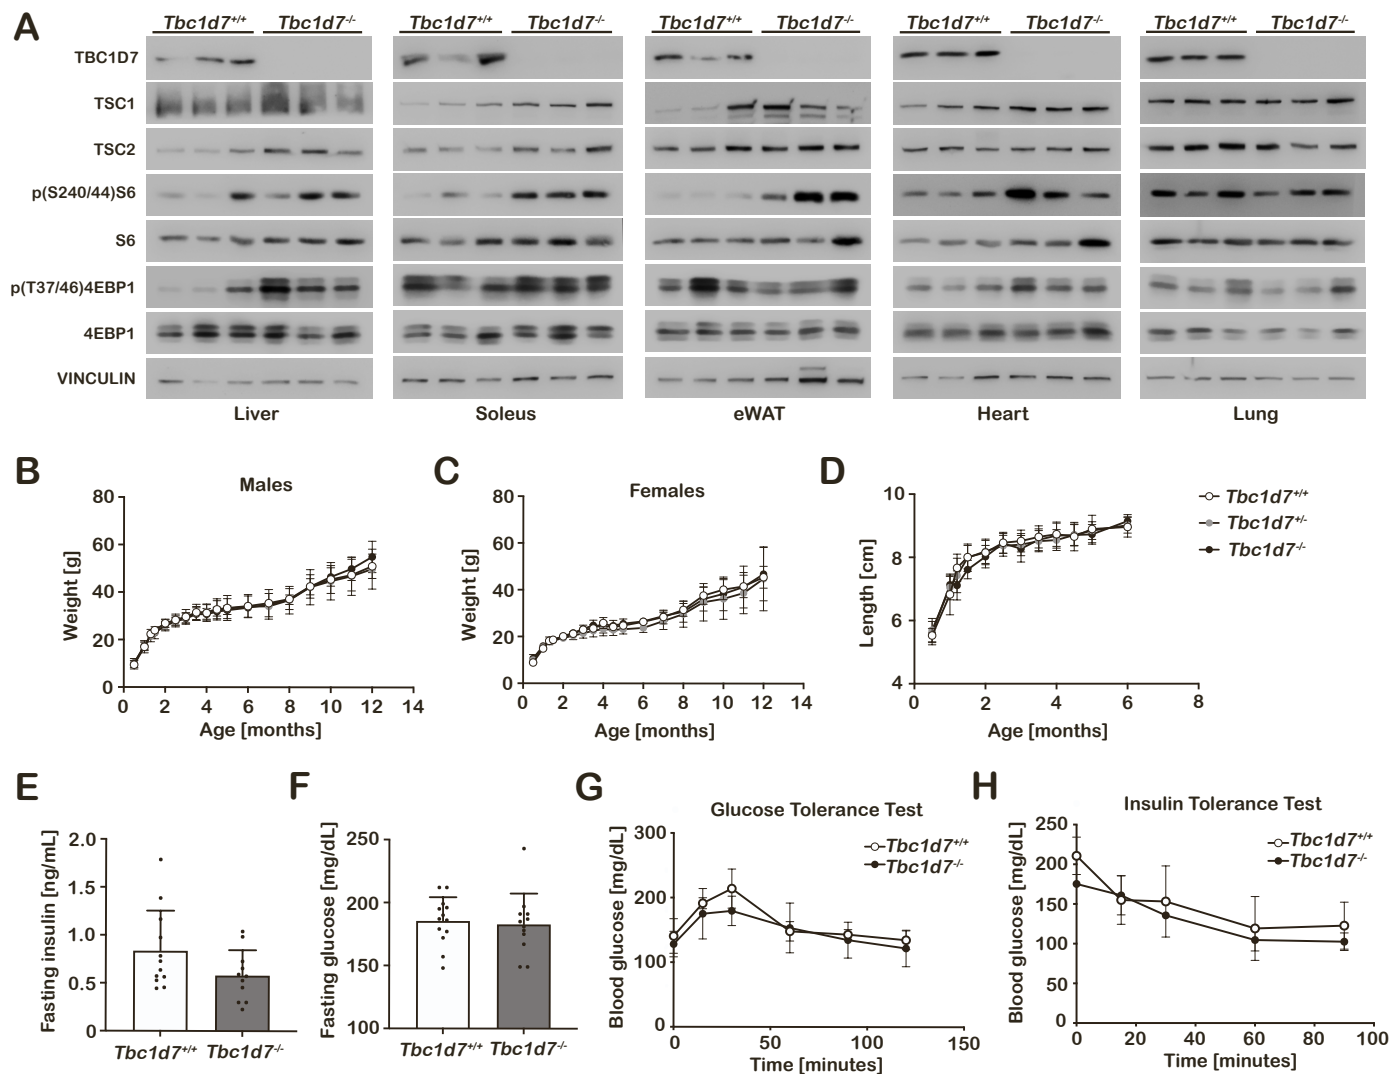

**Supplemental Figure 1: Related to Figure 1.**

(A) Loss of TBC1D7 protein in tissue lysates from *Tbc1d7*<sup>-/-</sup> mice, with a tissue-specific increase in phospho-S6 and phospho-4EBP1. Sample data from 3 mice of each genotype at 6 weeks of age following a 6-hr daytime fast are shown.

(B,C) Weights from a cohort of littermate offspring, separated by gender, from crosses between *Tbc1d7*<sup>+/-</sup> mice over 13 months graphed as mean ± S.D. at each age. (B) N= 6 *Tbc1d7*<sup>+/+</sup>, 10 *Tbc1d7*<sup>+/-</sup> and 4 *Tbc1d7*<sup>-/-</sup> male mice; (C) N= 7 *Tbc1d7*<sup>+/+</sup>, 9 *Tbc1d7*<sup>+/-</sup> and 8 *Tbc1d7*<sup>-/-</sup> female mice. Age 0 is the weight at weaning (21 days).

(D) Length (snout to tail) of mice from a cohort of littermate offspring from crosses between *Tbc1d7*<sup>+/-</sup> mice over 6 months graphed as mean ± S.D. at each age. N= 13 *Tbc1d7*<sup>+/+</sup>, 19 *Tbc1d7*<sup>+/-</sup> and 12 *Tbc1d7*<sup>-/-</sup> mice. Age 0 is the weight at weaning (21 days).

(E,F) Fasting insulin and glucose from 6 month-old mice graphed as mean ± S.D.. N= 12 *Tbc1d7*<sup>+/+</sup> and 13 *Tbc1d7*<sup>-/-</sup>.

(G,H) Glucose Tolerance Test (GTT) and Insulin Tolerance Test (ITT) in 3 month-old mice graphed as mean ± S.D.. N= 4 *Tbc1d7*<sup>+/+</sup> and 3 *Tbc1d7*<sup>-/-</sup>.

# supplemental FIGURE 2

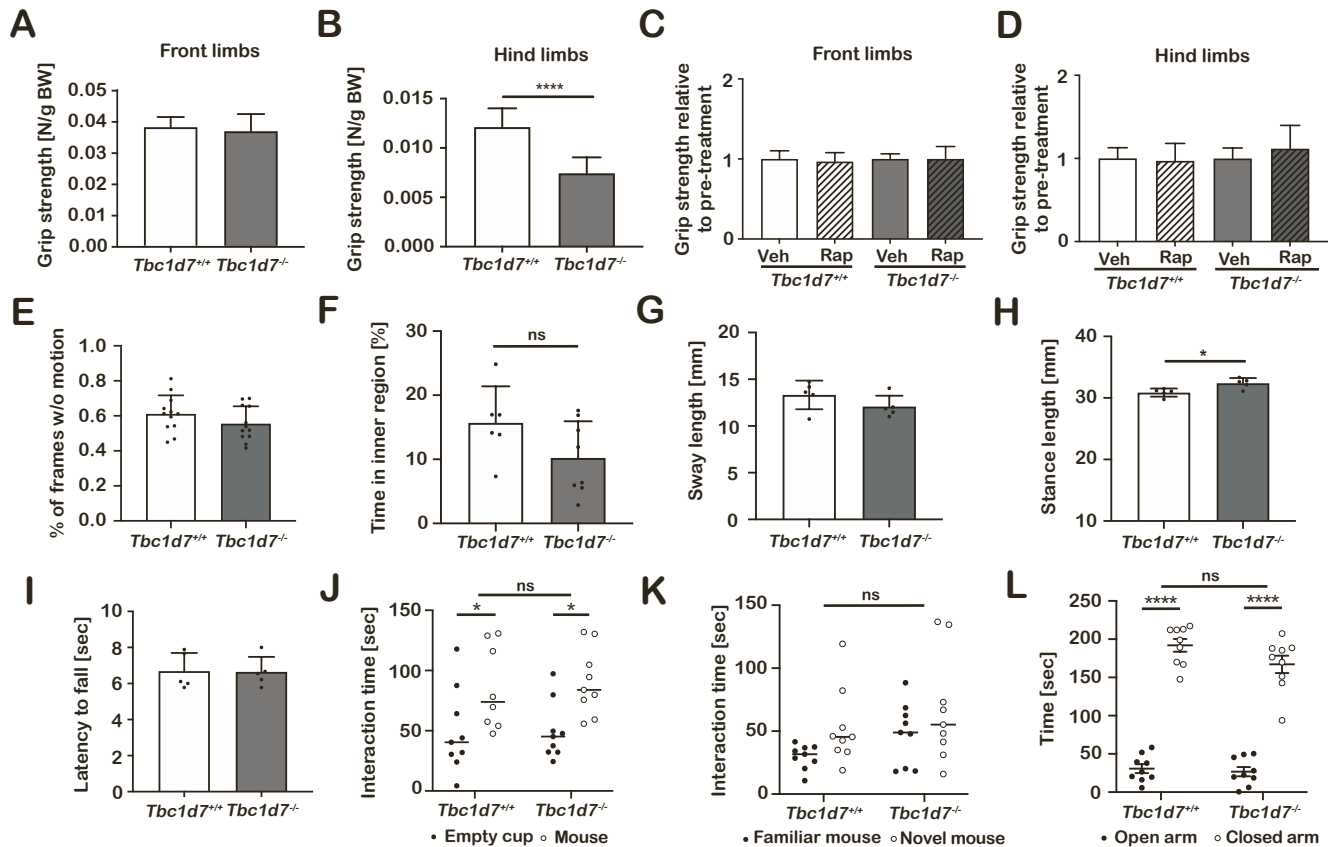

**Supplemental Figure 2: Related to Figure 2.**

(A-D) Grip strength measurements of front limbs (A) and hind limbs (B) in 3 month-old mice (Pre-treatment). Data is graphed as mean  $\pm$  S.D. for 10 mice per genotype. Grip strength measurements of front limbs (C) and hind limbs (D) in 4 month-old mice after a month treatment with vehicle or rapamycin (1 mg/kg, MWF) treatment. Data are graphed as mean  $\pm$  S.D. relative to pre-treatment strength. N=5 mice per genotype and treatment group. Statistical analysis by Student's t-test, \*\*\*\*p < 0.0001.

(E,F) Open field test of 6 month-old mice, with percent of time without motion (E) and time spent in the inner region (F), quantified for 12 mice of each genotype and graphed as mean  $\pm$  S.D..

(G,H) Gait analysis of 6 month-old mice with (G) sway length and (H) stance length quantified for 5 mice of each genotype and graphed as mean  $\pm$  S.D.. Statistical analysis by Student's t-test, \*p < 0.05.

(I) Motor coordination test on an accelerating rotarod for 6 month-old mice. Data are from 9 mice of each genotype, graphed as mean latency to fall over 5 trials per mouse  $\pm$  S.E.M..

(J-L) Three-chamber test (J, K) and elevated plus-maze test (L) performed on 6 month-old mice for 9 mice of each genotype and graphed as mean  $\pm$  S.D.. Statistical analysis by two-way ANOVA, \*p < 0.05, \*\*\*\*p < 0.0001.

# supplemental FIGURE 3

**A**

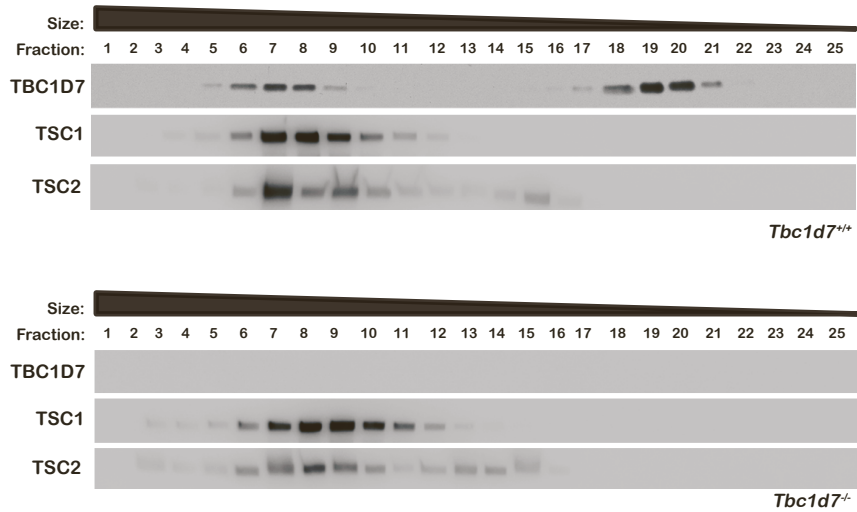

**B**

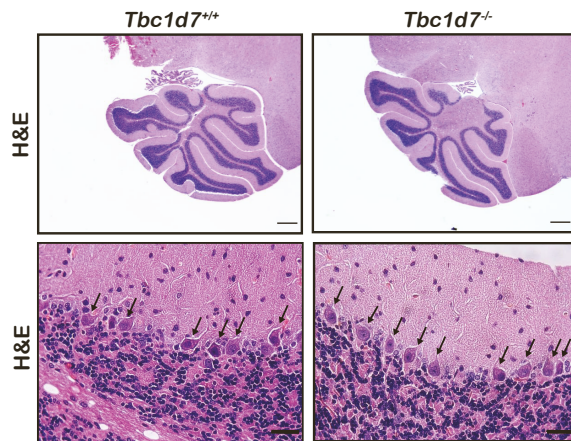

**C**

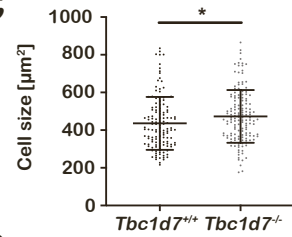

**D**

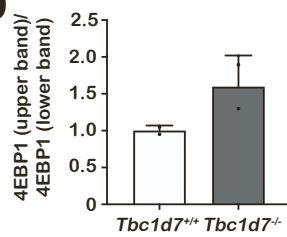

**E**

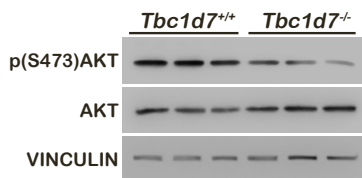

**F**

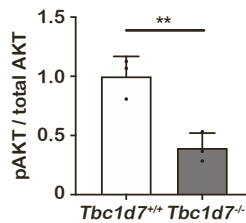

**H**

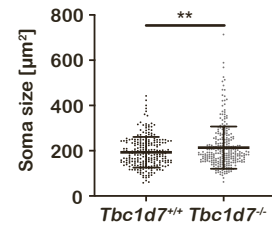

**G**

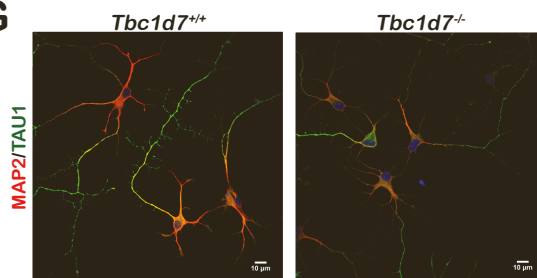

**I**

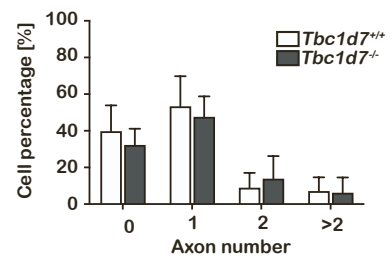

**Supplemental Figure 3: Related to Figure 4.**

(A) Immunoblots of size exclusion chromatography fractions of whole brain lysates from mice aged 1 year.

(B,C) Histological analysis of the cerebellum in sagittal sections of brains from 6 week-old mice stained for H&E. (C) The soma area of Purkinje neurons (arrows in B) cell size (C) was measured in sections from 5 mice

of each genotype and graphed as mean  $\pm$  S.D.. Scale bars = 500  $\mu$ m (top) and, 50  $\mu$ m (bottom). N= 131

*Tbc1d7*<sup>+/+</sup> and 148 *Tbc1d7*<sup>-/-</sup> cells.

(D) Quantification of 4E-BP1 upper to lower band ratio from immunoblot in figure 4D, graphed as mean  $\pm$  S.D..

N=2.

(E,F) Immunoblot of whole brain lysates from 3 mice of each genotype at 6 weeks of age following a 6-hr daytime fast are shown in (E) and quantified as the mean ratio of P-Akt to total Akt  $\pm$  S.D. (F).

(G-I) Immunofluorescence imaging of primary hippocampal neurons at DIV4 (G), with soma area (H) and axon number (I) measured and graphed as mean  $\pm$  S.D. for 2 technical replicates in each of 3 independent

experiments. N= 238 *Tbc1d7*<sup>+/+</sup> and 279 *Tbc1d7*<sup>-/-</sup> cells.

Statistical analysis (C,F,H) by Student's t-test, \*p < 0.05, \*\*p < 0.01.
